# Supplementary material
Source: PubMed Central journal article supplement (PMC6054880)
Supplement: NIHMS968873-supplement-supplement_1.pdf [file NIHMS968873-supplement-supplement_1.pdf]

**Supplemental Table 1:** Detailed definitions and technical information for sociodemographics, health behaviors, and chronic medical conditions.

| Characteristic                    | Definition and/or Technical Information                                                                                                                                                                                                                                                                                               |
|-----------------------------------|---------------------------------------------------------------------------------------------------------------------------------------------------------------------------------------------------------------------------------------------------------------------------------------------------------------------------------------|
| <b>Sociodemographics</b>          |                                                                                                                                                                                                                                                                                                                                       |
| Age                               | Age in years                                                                                                                                                                                                                                                                                                                          |
| Gender                            | Male, female                                                                                                                                                                                                                                                                                                                          |
| Race                              | Black, white                                                                                                                                                                                                                                                                                                                          |
| Education                         | Participant reported: <ul style="list-style-type: none"> <li>- Less than high school</li> <li>- High school graduate</li> <li>- Some college</li> <li>- College or higher</li> <li>- Missing</li> </ul>                                                                                                                               |
| Income                            | Participant reported: <ul style="list-style-type: none"> <li>- &lt;\$20k</li> <li>- \$20k-\$34k</li> <li>- \$35k-\$74k</li> <li>- ≥\$75k</li> <li>- Missing (not reported)</li> </ul>                                                                                                                                                 |
| Geographic Region                 | Participant residence: <ul style="list-style-type: none"> <li>- Stroke Buckle (coastal plains of North Carolina, South Carolina and Georgia)</li> <li>- Stroke Belt (remainder of North Carolina, South Carolina and Georgia, plus Tennessee, Mississippi, Alabama, Louisiana and Arkansas)</li> </ul> Non-Belt/Buckle (other states) |
| <b>Health Behaviors</b>           |                                                                                                                                                                                                                                                                                                                                       |
| Smoking Status                    | Participant reported: <ul style="list-style-type: none"> <li>- Current</li> <li>- Past</li> <li>- Never</li> </ul>                                                                                                                                                                                                                    |
| Alcohol use                       | Participant reported: <ul style="list-style-type: none"> <li>- None</li> <li>- Moderate (up to 1 drink per day for women or 2 drinks per day for men)</li> <li>- Heavy (&gt;1 drink per day for women and &gt;2 drinks per day for men).(67)</li> </ul>                                                                               |
| Exercise activity                 | Participant reported: <ul style="list-style-type: none"> <li>- None</li> <li>- 1 to 3 times per week</li> <li>- 4 or more times per week.</li> </ul>                                                                                                                                                                                  |
| <b>Chronic Medical Conditions</b> |                                                                                                                                                                                                                                                                                                                                       |
| Atrial Fibrillation               | Participant reported history of atrial fibrillation or ECG evidence of atrial fibrillation.                                                                                                                                                                                                                                           |
| Chronic Lung Disease              | Participant use of pulmonary medications (beta agonists, leukotriene inhibitors, inhaled corticosteroids, combination                                                                                                                                                                                                                 |

inhalers, ipratropium, cromolyn, aminophylline and theophylline) as a surrogate for chronic lung disease.

|                           |                                                                                                                                                                                                 |
|---------------------------|-------------------------------------------------------------------------------------------------------------------------------------------------------------------------------------------------|
| Coronary Artery Disease   | Participant reported history of myocardial infarction, coronary artery bypass grafting, or cardiac angioplasty or stenting, or baseline electrocardiographic evidence of myocardial infarction. |
| Chronic Kidney Disease    | Defined as measured glomerular filtration rate of <60 ml/min based upon serum creatinine.                                                                                                       |
| Diabetes                  | Fasting glucose $\geq 126$ mg/L (or a glucose $\geq 200$ mg/L for those not fasting) or participant reported use of insulin or oral hypoglycemic agents.                                        |
| Deep Vein Thrombosis      | Participant reported history of deep vein thrombosis.                                                                                                                                           |
| Dyslipidemia              | Low-density lipoprotein cholesterol >130 mg/dL or participant reported use of lipid lowering medications.                                                                                       |
| Hypertension              | Systolic blood pressure $\geq 140$ mm Hg, diastolic blood pressure $\geq 90$ mm Hg, or participant reported antihypertensive agent use.                                                         |
| Obesity                   | {Waist circumference [ $>102$ cm for males or $>88$ cm for females]} or {body mass index $\geq 30$ kg/m <sup>2</sup> }.                                                                         |
| Peripheral Artery Disease | Participant reported history of lower extremity arterial bypass or leg amputation.                                                                                                              |
| Stroke                    | Participant reported history of stroke or transient ischemic attack.                                                                                                                            |

---

**Medications**

---

|             |                                                                                                                                                                  |
|-------------|------------------------------------------------------------------------------------------------------------------------------------------------------------------|
| Aspirin use | Self-reported participant chronic use of aspirin at baseline.                                                                                                    |
| Statin use  | Self-reported participant chronic use of statins at baseline.                                                                                                    |
| Steroid use | Steroid use is the reported use of oral or injectable hydrocortisone, dexamethasone, fludrocortisone, prednisone, methyl prednisone, budesonide, and stanozolol. |

---

**Biomarkers**

---

|                                             |                                                                                                                                                                                                                                                                                                                              |
|---------------------------------------------|------------------------------------------------------------------------------------------------------------------------------------------------------------------------------------------------------------------------------------------------------------------------------------------------------------------------------|
| Albumin-to-Creatinine Ratio (ACR)           | Abnormal defined as ACR $\geq 30$ mcg/mg.<br>Albumin assay by nephelometry (BN ProSpec Nephelometer, Dade Behring, Siemens Healthcare, Deerfield, Illinois, USA).<br>Urinary creatinine assay determined by rate blanked Jaffé procedure (Modular-P analyzer, Roche/Hitachi, Roche Diagnostics, Indianapolis, Indiana, USA). |
| Cystatin C                                  | Abnormal defined as Cyst-C measurements above the fourth quartile ( $\geq 1.11$ mg/dL)<br>Assay by particle-enhanced immunonephelometry (N Latex Cyst-C, Siemens AG, Munich, Germany).                                                                                                                                       |
| High Sensitivity C-Reactive Protein (hsCRP) | Abnormal defined as hsCRP $>3.0$ mg/dL<br>Assay by particle-enhanced immunonephelometry (N High-sensitivity CRP, Siemens AG, Munich, Germany).                                                                                                                                                                               |

---
